# Supplementary material for: Large scale synthesis of carbon nanospheres and their application as electrode materials for heavy metal ions detection
Source: Royal Society of Chemistry journal article supplement (doi:10.1039/c1nj20756c), 2011-10-31
Supplement: c1nj20756c.pdf [file c1nj20756c.pdf]

## Supporting Information:

# Large Scale Synthesis of Carbon Nanospheres and Their Application as Electrode Materials for Heavy Metal Ions Detection

Keming Pan, Hai Ming, Yang Liu\* and Zhenhui Kang\*

Institute of Functional Nano & Soft Materials (FUNSOM) and Jiangsu Key Laboratory for Carbon-Based Functional Materials and Devices, Soochow University, Suzhou 215123, China

The particle sizes characterization of as-synthesized CNSs was performed on MALVERN ZEN3690.

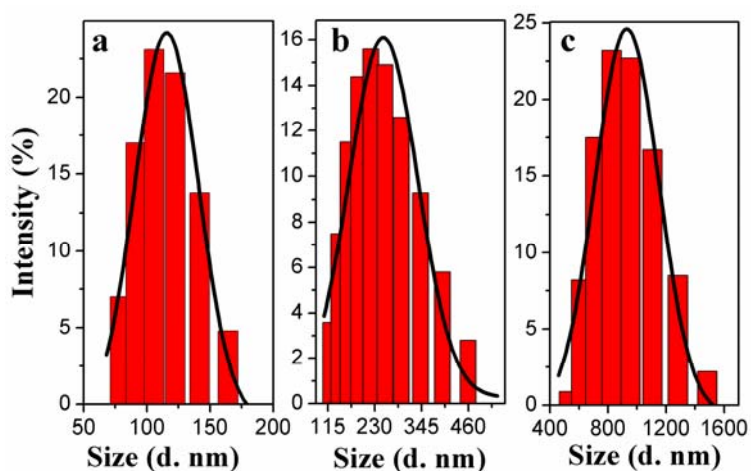

**Figure S1.** The particle sizes distribution of (a) 100 nm CNSs, (b) 230 nm CNSs and (c) 900 nm CNSs.

The specific surface area of CNSs was characterized by ASAP 2050. The BET data was shown as follow: (a)  $18.7245 \text{ m}^2 \cdot \text{g}^{-1}$  for 100 nm CNSs, (b)  $2.7530 \text{ m}^2 \cdot \text{g}^{-1}$  for 230 nm CNSs and (c)  $1.6543 \text{ m}^2 \cdot \text{g}^{-1}$  for 900 nm CNSs.

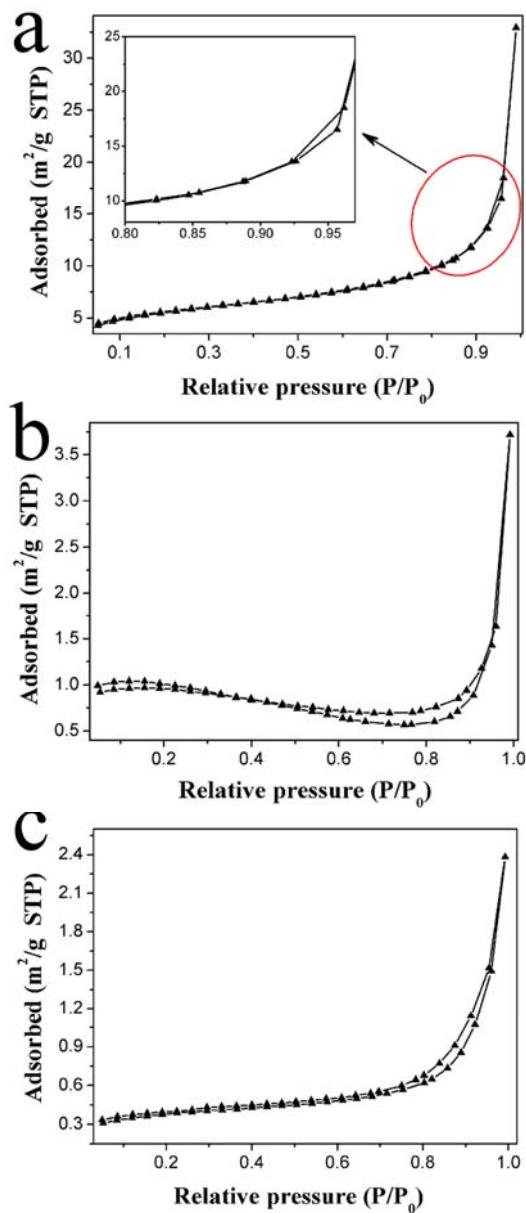

**Figure S2.**  $\text{N}_2$  adsorption–desorption isotherms of (a) 100 nm CNSs, (b) 230 nm CNSs, and (c) 900 nm CNSs.
